# Supplementary material for: Pomegranate Extract Administration Reverses Loss of Motor Coordination and Prevents Oxidative Stress in Cerebellum of Aging Mice
Source: MDPI journal article supplement (doi:10.3390/antiox12111991), 2023-11-11
Supplement: s1 [file s1]

Table S1. Pomegranate polyphenols content from Pomanox ® P30.

|                                |                                                                                                                            | Concentration(g/100g) |
|--------------------------------|----------------------------------------------------------------------------------------------------------------------------|-----------------------|
| <b>Pomegranate polyphenols</b> | Pomegranate polyphenols were calculated by adding the sum of punicalagins+ellagic acid+other ellagitannins+anthocyanins    | 44.2                  |
| <b>Ellagitannins</b>           | Punicalagins                                                                                                               | 31.6                  |
|                                | Ellagic acid                                                                                                               | 1.5                   |
|                                | Other ellagitannins (galloylglucose.punicalin. ellagic acid glucoside. ellagic acid rhamnoside)                            | 11.1                  |
| <b>Anthocyanins</b>            | (delphinidin3.5-diglucoside. cyanidin3.5-diglucoside.delphinidin 3-glucoside.cyanidin 3-glucoside.pelargonidin3-glucoside) | <0.1                  |

Table S2. Hematological parameters in the blood of old mice with or without supplementation of pomegranate extract.

| Hematological parameters   | Old 22 months |        | Old 22 months + PE |        | p-value |
|----------------------------|---------------|--------|--------------------|--------|---------|
|                            | Mean          | SD     | Mean               | SD     |         |
| WBC (10 <sup>9</sup> /L)   | 4.27          | 1.47   | 3.76               | 1.63   | 0.38    |
| Neu # (10 <sup>9</sup> /L) | 1.52          | 0.87   | 1.20               | 5.03   | 0.50    |
| Lym # (10 <sup>9</sup> /L) | 2.40          | 1.13   | 2.00               | 8.88   | 0.61    |
| Eos # (10 <sup>9</sup> /L) | 0.15          | 0.08   | 0.19               | 3.69   | 0.69    |
| Bas # (10 <sup>9</sup> /L) | 0.01          | 0.02   | 0.01               | 0.06   | 0.45    |
| Neu % (%)                  | 34.72         | 9.80   | 33.45              | 0.29   | 0.81    |
| Lym % (%)                  | 56.10         | 10.06  | 50.50              | 1.27   | 0.39    |
| Eos % (%)                  | 4.53          | 4.00   | 5.88               | 0.11   | 0.60    |
| Bas % (%)                  | 0.38          | 0.14   | 0.35               | 0.01   | 0.65    |
| RBC (10 <sup>12</sup> /L)  | 7.79          | 0.26   | 7.62               | 0.55   | 0.49    |
| HGB (g/dL)                 | 10.98         | 0.74   | 10.63              | 0.94   | 0.50    |
| HCT (%)                    | 34.52         | 1.99   | 33.85              | 3.91   | 0.74    |
| MCV (fL)                   | 44.27         | 2.06   | 44.38              | 2.84   | 0.95    |
| MCH (pg)                   | 14.10         | 0.87   | 13.93              | 0.38   | 0.71    |
| MCHC (g/dL)                | 17.08         | 0.53   | 32.57              | 16.29  | 0.77    |
| RDW-CV (%)                 | 16.66         | 1.04   | 14.93              | 1.16   | 0.07    |
| PLT (10 <sup>9</sup> /L)   | 731.50        | 208.47 | 1592.25            | 934.74 | 0.32    |
| MPV (fL)                   | 5.46          | 0.09   | 5.57               | 2.78   | 0.87    |

PE: pomegranate extract; *n*= 6 Old 22 months' mice and *n*= 4 Supplemented Old 22 months' mice.

Table S3. Biochemical parameters in the blood of old mice with or without supplementation of pomegranate extract.

| Biochemical parameters | Old 22 months |       | Old 22 months +PE |       | p-value |
|------------------------|---------------|-------|-------------------|-------|---------|
|                        | Mean          | SD    | Mean              | SD    |         |
| Urea (mg/dl)           | 58.51         | 34.18 | 62.40             | 14.21 | 0.83    |
| Bun                    | 27.66         | 15.76 | 31.42             | 7.78  | 0.63    |
| Alb (g/dl)             | 3.15          | 0.42  | 3.64              | 0.47  | 0.09    |

|                     |         |         |         |          |       |
|---------------------|---------|---------|---------|----------|-------|
| <b>Cpk (mg/dl)</b>  | 3982.00 | 3257.00 | 7216.00 | 74445.00 | 0.92  |
| <b>Alp (u/l)</b>    | 53.85   | 17.50   | 56.80   | 21.39    | 0.79  |
| <b>Crea (u/l)</b>   | 0.45    | 0.19    | 0.53    | 0.21     | 0.49  |
| <b>Alt (u/l)</b>    | 32.85   | 7.05    | 35.80   | 15.07    | 0.65  |
| <b>Glu (mmol/l)</b> | 163.85  | 58.93   | 185.60  | 61.04    | 0.54  |
| <b>Tp (g/dl)</b>    | 4.11    | 1.02    | 5.02    | 0.61     | 0.11  |
| <b>Lac (mmol/l)</b> | 3.22    | 1.50    | 5.22    | 1.30     | 0.04* |

PE: pomegranate extract; *n*= 7 Old 22 months' mice and *n*= 5 Supplemented Old 22 months' mice. \**p* < 0.05

Table S4. Body composition of old mice with or without supplementation of pomegranate extract.

| <b>Body composition</b>             | <b>Old 18 months</b> |           | <b>Old 22 months</b> |           | <b>Old 22 months + PE</b> |           | <b><i>p</i>- value</b> |                          |                          |
|-------------------------------------|----------------------|-----------|----------------------|-----------|---------------------------|-----------|------------------------|--------------------------|--------------------------|
|                                     | <b>Mean</b>          | <b>SD</b> | <b>Mean</b>          | <b>SD</b> | <b>Mean</b>               | <b>SD</b> | <b>18mo vs 22mo</b>    | <b>18mo vs 22mo + PE</b> | <b>22mo vs 22mo + PE</b> |
| <b>BW</b>                           | 35.42                | 3.51      | 35.05                | 1.24      | 35.63                     | 3.59      | 0.68                   | 0.98                     | 0.74                     |
| <b>%FAT</b>                         | 23.31                | 5.19      | 18.06                | 3.56      | 17.23                     | 2.83      | 0.38                   | 0.17                     | 0.72                     |
| <b>%LEAN</b>                        | 69.45                | 19.22     | 80.1                 | 3.55      | 80.93                     | 2.55      | 0.27                   | 0.30                     | 0.70                     |
| <b>BMC (g)</b>                      | 0.90                 | 0.09      | 0.79                 | 0.05      | 0.78                      | 0.09      | 0.10                   | 0.09                     | 0.94                     |
| <b>BMD (g/cm<sup>2</sup>)</b>       | 0.08                 | 0.00      | 0.07                 | 0.01      | 0.07                      | 0.01      | 0.07                   | 0.22                     | 0.88                     |
| <b>Bone volume (cm<sup>3</sup>)</b> | 0.28                 | 0.03      | 0.25                 | 0.02      | 0.19                      | 0.12      | 0.09                   | 0.23                     | 0.33                     |
| <b>Bone area (cm<sup>2</sup>)</b>   | 11.91                | 0.78      | 11.31                | 0.27      | 11.98                     | 1.35      | 0.12                   | 0.64                     | 0.31                     |

PE: pomegranate extract; mo= months; *n*= 13 Old 18 months' mice. *n*= 5 Old 22 months' mice and *n*= 4 Supplemented Old 22 months' mice.
